# Supplementary material for: Frequent ATRX, CIC, FUBP1 and IDH1 mutations refine the classification of malignant gliomas
Source: PubMed Central journal article supplement (PMC3443254; doi:10.18632/oncotarget.588), 2012-08-03
Supplement: oncotarget-03-709-s001.pdf [file oncotarget-03-709-s001.pdf]

# Frequent *ATRX*, *CIC*, and *FUBP1* mutations refine the classification of malignant gliomas – Jiao et al

**Supplementary Table 1. *ATRX*, *CIC*, and *FUBP1* mutation details.**

| Sample ID | Gene        | Nucleotide (genomic)*                                                                     | Amino acid <sup>5</sup> (protein) | Mutation type | Mutation Location (Exon) | Domain |
|-----------|-------------|-------------------------------------------------------------------------------------------|-----------------------------------|---------------|--------------------------|--------|
| GBM IV-3  | <i>ATRX</i> | g.chrX:76838758_76838759AT>C(hom)                                                         | frameshift                        | indel         | 5                        |        |
| GBM IV-5  | <i>ATRX</i> | g.chrX:76831065delG(hom)                                                                  | frameshift                        | indel         | 7                        | ADD    |
| A III-22  | <i>ATRX</i> | g.chrX:76831012delT                                                                       | frameshift                        | indel         | 7                        | ADD    |
| OA II-1   | <i>ATRX</i> | g.chrX:76831012delT                                                                       | frameshift                        | indel         | 7                        | ADD    |
| GBM IV-6  | <i>ATRX</i> | g.chrX:76831000A>C                                                                        | p.Y187X                           | nonsense      | 7                        | ADD    |
| OA III-9  | <i>ATRX</i> | g.chrX:76827136het_delT                                                                   | frameshift                        | indel         | 8                        | ADD    |
| O II-10   | <i>ATRX</i> | g.chrX:76827087C>A                                                                        | p.R221M                           | missense      | 8                        | ADD    |
| A II-3    | <i>ATRX</i> | g.chrX:76826742G>C(hom)                                                                   | frameshift                        | splice site   | in9                      | ADD    |
| A III-1   | <i>ATRX</i> | g.chrX:76826646A>T                                                                        | p.L253X                           | nonsense      | 9                        | ADD    |
| GBM IV-9  | <i>ATRX</i> | g.chrX:76826615C>T(hom)                                                                   | p.W263X                           | nonsense      | 9                        | ADD    |
| O III-1   | <i>ATRX</i> | g.chrX:76826597_76826603delGTGACAA(hom)                                                   | frameshift                        | indel         | 9                        | ADD    |
| A III-14  | <i>ATRX</i> | g.chrX:76826584_76826585insA(hom)                                                         | frameshift                        | indel         | 9                        | ADD    |
| A II-8    | <i>ATRX</i> | g.chrX:76826530G>A                                                                        | p.Q292X                           | nonsense      | 9                        |        |
| A III-21  | <i>ATRX</i> | g.chrX:76826336_76826337insT                                                              | frameshift                        | indel         | 9                        |        |
| OA III-14 | <i>ATRX</i> | g.chrX:76826330delT(hom)                                                                  | frameshift                        | indel         | 9                        |        |
| OA II-4   | <i>ATRX</i> | g.chrX:76826328_76826329insT                                                              | frameshift                        | indel         | 9                        |        |
| A II-2    | <i>ATRX</i> | g.chrX:76826328_76826329insT                                                              | frameshift                        | indel         | 9                        |        |
| A III-12  | <i>ATRX</i> | g.chrX:76826327_76826330delCAGT                                                           | frameshift                        | indel         | 9                        |        |
| GBM IV-1  | <i>ATRX</i> | g.chrX:76826327_76826330delCAGT                                                           | frameshift                        | indel         | 9                        |        |
| GBM IV-2  | <i>ATRX</i> | g.chrX:76826245delT                                                                       | frameshift                        | indel         | 9                        |        |
| A III-6   | <i>ATRX</i> | g.chrX:76826130_76826131delTT                                                             | frameshift                        | indel         | 9                        |        |
| OA III-11 | <i>ATRX</i> | g.chrX:76825972delC(hom)                                                                  | frameshift                        | indel         | 9                        |        |
| A II-4    | <i>ATRX</i> | g.chrX:76825807C>A(hom)                                                                   | p.E533X                           | nonsense      | 9                        |        |
| A III-23  | <i>ATRX</i> | g.chrX:76825807C>A(hom)                                                                   | p.E533X                           | nonsense      | 9                        |        |
| OA II-6   | <i>ATRX</i> | g.chrX:76825753C>A                                                                        | p.G551X                           | nonsense      | 9                        |        |
| A II-7    | <i>ATRX</i> | g.chrX:76825743_76825744delITG                                                            | frameshift                        | indel         | 9                        |        |
| GBM IV-10 | <i>ATRX</i> | g.chrX:76825743_76825744delITG                                                            | frameshift                        | indel         | 9                        |        |
| A II-9    | <i>ATRX</i> | g.chrX:76825412_76825413insAAGGGTGTAGTCATCTTCATCTGAATTAGATGTTACAGGGTTAGTTTCTGTCGGTCGCCCTC | frameshift                        | indel         | 9                        |        |
| O II-11   | <i>ATRX</i> | g.chrX:76825234_76825235delTC                                                             | frameshift                        | indel         | 9                        |        |
| A III-27  | <i>ATRX</i> | g.chrX:76825229_76825230delCA                                                             | frameshift                        | indel         | 9                        |        |
| GBM IV-4  | <i>ATRX</i> | g.chrX:76825188_76825194delTTGAGGA                                                        | frameshift                        | indel         | 9                        |        |
| A III-3   | <i>ATRX</i> | g.chrX:76825164_76825165delICT(hom)                                                       | frameshift                        | indel         | 9                        |        |
| OA II-9   | <i>ATRX</i> | g.chrX:76825118_76825163delCTTATGGTTTGTATGAATTCATTAATATCAGTATCTGAAGAAGAA(hom)             | frameshift                        | indel         | 9                        |        |
| A III-20  | <i>ATRX</i> | g.chrX:76825069_76825075delTTTTTCC(hom)                                                   | frameshift                        | indel         | 9                        |        |
| A III-25  | <i>ATRX</i> | g.chrX:76825063G>A(hom)                                                                   | p.R781X                           | nonsense      | 9                        |        |
| A III-15  | <i>ATRX</i> | g.chrX:76825041G>C(hom)                                                                   | p.S788X                           | nonsense      | 9                        |        |
| A II-6    | <i>ATRX</i> | g.chrX:76825014delIG                                                                      | frameshift                        | indel         | 9                        |        |
| A II-5    | <i>ATRX</i> | g.chrX:76824982G>A                                                                        | p.R808X                           | nonsense      | 9                        |        |
| A III-24  | <i>ATRX</i> | g.chrX:76824982G>A                                                                        | p.R808X                           | nonsense      | 9                        |        |
| OA II-7   | <i>ATRX</i> | g.chrX:76824777delG(hom)                                                                  | frameshift                        | indel         | 9                        |        |
| O III-15  | <i>ATRX</i> | g.chrX:76824745_76824748delTCTC(hom)                                                      | frameshift                        | indel         | 9                        |        |
| A III-2   | <i>ATRX</i> | g.chrX:76824595T>A(hom)                                                                   | p.R937X                           | nonsense      | 9                        |        |
| A III-16  | <i>ATRX</i> | g.chrX:76824424_76824425insT                                                              | frameshift                        | indel         | 9                        |        |
| A III-10  | <i>ATRX</i> | g.chrX:76824273_76824277delTTTTTC(hom)                                                    | frameshift                        | indel         | 9                        |        |
| A III-28  | <i>ATRX</i> | g.chrX:76824267_76824271delCTTTT                                                          | frameshift                        | indel         | 9                        |        |

|             |      |                                                     |                     |             |      |                     |
|-------------|------|-----------------------------------------------------|---------------------|-------------|------|---------------------|
| OA III-5    | ATRX | g.chrX:76824267_76824271delCTTTT                    | frameshift          | indel       | 9    |                     |
| OA III-12   | ATRX | g.chrX:76824258delA(hom)                            | frameshift          | indel       | 9    |                     |
| A III-8     | ATRX | g.chrX:76824256_76824257delTT(hom)                  | frameshift          | indel       | 9    |                     |
| O II-7      | ATRX | g.chrX:76824089delT                                 | frameshift          | indel       | 9    |                     |
| A III-13    | ATRX | g.chrX:76824059A>C                                  | p.Y1115X            | nonsense    | 9    |                     |
| OA III-15   | ATRX | g.chrX:76823706_76823707het_delAA(hom)              | frameshift          | indel       | 9    |                     |
| A III-17    | ATRX | g.chrX:76823670G>C                                  | p.S1245X            | nonsense    | 9    |                     |
| GBM IV-8    | ATRX | g.chrX:76806828_76806829insT                        | frameshift          | indel       | 11   |                     |
| O II-1      | ATRX | g.chrX:76806828_76806829insT                        | frameshift          | indel       | 11   |                     |
| OA III-3    | ATRX | g.chrX:76805654_76805655insA                        | frameshift          | indel       | 12   |                     |
| OA II-10    | ATRX | g.chrX:76805622delC                                 | frameshift          | indel       | 12   |                     |
| OA III-1    | ATRX | g.chrX:76805531_76805534delTCTT                     | frameshift          | indel       | 12   |                     |
| pedGBM IV-1 | ATRX | g.chrX:76798774_76798775delAG(hom)                  | frameshift          | indel       | 13   |                     |
| A III-18    | ATRX | g.chrX:76798761delA                                 | frameshift          | indel       | 13   |                     |
| pedGBM IV-4 | ATRX | g.chrX:76798738_76798741delACTA                     | frameshift          | indel       | 13   |                     |
| OA III-10   | ATRX | g.chrX:76796285G>A                                  | p.R1426X            | nonsense    | 14   |                     |
| A II-11     | ATRX | g.chrX:76796254delC                                 | frameshift          | indel       | 14   |                     |
| GBM IV-14   | ATRX | g.chrX:76794307G>A                                  | p.R1504X            | nonsense    | 15   |                     |
| O II-3      | ATRX | g.chrX:76794277G>A(hom)                             | p.R1514X            | nonsense    | 15   |                     |
| M IV-2      | ATRX | g.chrX:76778161_76778162insA                        | frameshift          | indel       | 16   |                     |
| OA II-8     | ATRX | g.chrX:76776798_76776801delTTTC(hom)                | frameshift          | indel       | 17   | SNF2 Helicase       |
| OA II-5     | ATRX | g.chrX:76776798_76776801delTTTC                     | frameshift          | indel       | 17   | SNF2 Helicase       |
| OA III-7    | ATRX | g.chrX:76775702_76775710delTAAGTTACC(hom)           | frameshift          | indel       | 18   | SNF2 Helicase       |
| A III-5     | ATRX | g.chrX:76775378_76775381delTTTC                     | frameshift          | indel       | 19   | SNF2 Helicase       |
| OA III-13   | ATRX | g.chrX:76762576G>A                                  | p.R1739X            | nonsense    | 20   | SNF2 Helicase       |
| A III-9     | ATRX | g.chrX:76762551G>T(hom)                             | p.T1747K            | missense    | 20   | SNF2 Helicase       |
| A II-10     | ATRX | g.chrX:76761054_76761077delTCCTTAATGGATCCAAGTAAATTT | frameshift          | indel       | 21   | SNF2 Helicase       |
| GBM IV-12   | ATRX | g.chrX:76760970C>T                                  | p.R1803H            | missense    | 21   | SNF2 Helicase       |
| A III-7     | ATRX | g.chrX:76760968C>G                                  | p.A1804P            | missense    | 21   | SNF2 Helicase       |
| A III-26    | ATRX | g.chrX:76741689delT(hom)                            | frameshift          | indel       | 25   |                     |
| pedGBM IV-3 | ATRX | g.chrX:76741670_76741673delCTAT(hom)                | frameshift          | indel       | 25   |                     |
| pedGBM IV-2 | ATRX | g.chrX:76741530_76741533delACTC                     | del exon and intron | indel       | in25 |                     |
| A III-4     | ATRX | g.chrX:76700961_76700964delAAAT(hom)                | frameshift          | indel       | 29   | C-Terminal Helicase |
| GBM IV-16   | ATRX | g.chrX:76700843G>A(hom)                             | p.R2153C            | missense    | 29   | C-Terminal Helicase |
| GBM IV-11   | ATRX | g.chrX:76700843G>A(hom)                             | p.R2153C            | missense    | 29   | C-Terminal Helicase |
| OA III-8    | ATRX | g.chrX:76699762T>C                                  | p.E2172G            | missense    | 30   | C-Terminal Helicase |
| A III-19    | ATRX | g.chrX:76699712C>G                                  | p.V2189L            | missense    | 30   | C-Terminal Helicase |
| OA III-6    | ATRX | g.chrX:76665452_76665465delTTTGTTGGTCCAAAA          | frameshift          | indel       | 31   |                     |
| A II-1      | ATRX | g.chrX:76665420_76665423delTTTC;                    | frameshift          | indel       | 31   |                     |
| A III-11    | ATRX | g.chrX:76665420_76665423delTTTC                     | frameshift          | indel       | 31   |                     |
| GBM IV-13   | ATRX | g.chrX:76665385C>A                                  | frameshift          | splice site | in31 |                     |
| O III-2     | CIC  | g.chr19:47482765_47482766delTG(hom)                 | frameshift          | indel       | 2    |                     |
| O III-7     | CIC  | g.chr19:47482849_47482850insC                       | frameshift          | indel       | 2    | Pro-rich            |
| O III-3     | CIC  | g.chr19:47483213_47483214delGA(hom)                 | frameshift          | indel       | 3    |                     |
| O III-5     | CIC  | g.chr19:47483555C>T(hom)                            | p.R201W             | missense    | 5    | HMG Box             |
| O III-17    | CIC  | g.chr19:47483555C>T(hom)                            | p.R201W             | missense    | 5    | HMG Box             |
| O II-6      | CIC  | g.chr19:47483558C>T(hom)                            | p.R202W             | missense    | 5    | HMG Box             |
| O III-18    | CIC  | g.chr19:47483592G>C(hom)                            | p.R213P             | missense    | 5    | HMG Box             |
| O III-19    | CIC  | g.chr19:47483598G>A                                 | p.R215Q             | missense    | 5    | HMG Box             |
| O III-10    | CIC  | g.chr19:47483630G>T(hom)                            | p.D226Y             | missense    | 5    | HMG Box             |
| O II-5      | CIC  | g.chr19:47483658G>A                                 | p.G235D             | missense    | 5    | HMG Box             |
| M IV-3      | CIC  | g.chr19:47485356C>T                                 | p.R440C             | missense    | 8    |                     |
| O III-14    | CIC  | g.chr19:47485924_47485925insG                       | frameshift          | indel       | 9    |                     |
| GBM IV-7    | CIC  | g.chr19:47486450C>T(hom)                            | p.Q564X             | nonsense    | 10   | Pro-rich            |
| O III-16    | CIC  | g.chr19:47486575_47486576delTG(hom)                 | frameshift          | indel       | 10   | Pro-rich            |

|           |       |                                                    |             |             |      |          |
|-----------|-------|----------------------------------------------------|-------------|-------------|------|----------|
| O III-4   | CIC   | g.chr19:47486736_47486752delCCCCAGCAGCTCCCCTG(hom) | frameshift  | indel       | 10   | Pro-rich |
| O II-8    | CIC   | g.chr19:47487082_47487083insCCCCTG(hom)            | frameshift  | indel       | 10   | Pro-rich |
| O II-15   | CIC   | g.chr19:47487082_47487083insCCCCTG(hom)            | frameshift  | indel       | 10   | Pro-rich |
| OA III-4  | CIC   | g.chr19:47487095C>T                                | p.Q779X     | nonsense    | 10   | Pro-rich |
| O II-13   | CIC   | g.chr19:47487319_47487323delCAGCG(hom)             | frameshift  | indel       | 10   | Pro-rich |
| O III-21  | CIC   | g.chr19:47487549G>A(hom)                           | frameshift  | splice site | in10 | Pro-rich |
| O II-2    | CIC   | g.chr19:47487580_47487581insGC                     | frameshift  | indel       | 11   | Pro-rich |
| O II-4    | CIC   | g.chr19:47488077G>A                                | frameshift  | splice site | in12 | Pro-rich |
| OA II-2   | CIC   | g.chr19:47489118C>T                                | p.R1214X    | nonsense    | 15   | Pro-rich |
| OA III-2  | CIC   | g.chr19:47489221delC                               | frameshift  | indel       | 15   | Pro-rich |
| O III-6   | CIC   | g.chr19:47489795delC(hom)                          | frameshift  | indel       | 16   |          |
| O III-11  | CIC   | g.chr19:47489819_47489820delCT(hom)                | frameshift  | indel       | 16   |          |
| M IV-1    | CIC   | g.chr19:47490170G>C                                | p.D1401H    | missense    | 18   |          |
| O III-13  | CIC   | g.chr19:47490688G>T(hom)                           | p.V1474F    | missense    | 19   |          |
| O II-12   | CIC   | g.chr19:47490903_47490905delAGA                    | p.L1517delK | indel       | 20   |          |
| GBM IV-7  | FUBP1 | g.chr1:78208234_78208235insATAACCA                 | frameshift  | indel       | 2    |          |
| O II-14   | FUBP1 | g.chr1:78208200_78208201insC                       | frameshift  | indel       | 2    |          |
| O II-16   | FUBP1 | g.chr1:78206473delG                                | frameshift  | indel       | 3    |          |
| O III-9   | FUBP1 | g.chr1:78206436_78206439delCAGT(hom)               | frameshift  | indel       | 3    |          |
| GBM IV-15 | FUBP1 | g.chr1:78205024C>A                                 | frameshift  | splice site | 7    |          |
| O III-12  | FUBP1 | g.chr1:78202995_78202996insCT                      | frameshift  | indel       | in10 |          |
| GBM IV-13 | FUBP1 | g.chr1:78202625G>A                                 | p.P281L     | missense    | 11   | KH3      |
| O III-20  | FUBP1 | g.chr1:78201156C>A                                 | p.E411X     | nonsense    | 14   | KH4      |
| O III-14  | FUBP1 | g.chr1:78201054C>A                                 | p.E445X     | nonsense    | 14   |          |
| O III-17  | FUBP1 | g.chr1:78198726delG(hom)                           | frameshift  | indel       | 15   |          |
| O III-5   | FUBP1 | g.chr1:78198726delG(hom)                           | frameshift  | indel       | 15   |          |
| OA III-2  | FUBP1 | g.chr1:78198455A>G                                 | frameshift  | splice site | 16   |          |
| O III-3   | FUBP1 | g.chr1:78194962CT>C                                | p.AT530A    | indel       | 17   |          |
| O III-8   | FUBP1 | g.chr1:78194940_78194941insT(hom)                  | frameshift  | indel       | 17   |          |
| OA II-3   | FUBP1 | g.chr1:78194860_78194861insT                       | frameshift  | indel       | 17   |          |
| O II-9    | FUBP1 | g.chr1:78187532G>A                                 | p.Q608X     | nonsense    | 19   |          |
| O III-2   | FUBP1 | g.chr1:78187498_78187499delTA(hom)                 | frameshift  | indel       | 19   |          |

\*Coordinates refer to human reference genome hg18 release (NCBI 36.1, March 2006).

§ Single-letter abbreviations for the amino acid residues are as follows: A, Ala; C, Cys; D, Asp; E, Glu; F, Phe; G, Gly; H, His; K, Lys; L, Leu; M, Met; P, Pro; Q, Gln; R, Arg; S, Ser; T, Thr; V, Val; W, Trp; and X, STOP.

^Sample ID indicates tumor abbreviation followed by WHO grade. Abbreviations are as follows: AII, astrocytoma grade II; AIII, astrocytoma grade III; GBM IV, GBM grade IV; pedGBM, pediatric GBM grade IV; OII, oligodendroglioma grade II; OIII, oligodendroglioma grade III; OAII, oligoastrocytoma grade II; OAIII, oligoastrocytoma grade III; M IV, Medulloblastoma grade IV.

**Supplementary Table 2. Clinical characteristics from glioma patients in two cohorts.**

|                                         | <b>Cohort A*</b> | <b>Cohort B*</b> |
|-----------------------------------------|------------------|------------------|
| Total No. patients                      | 156              | 43               |
| No. grade II (%)                        | 27 (17)          | 4 (9)            |
| No. grade III (%)                       | 61 (39)          | 8 (19)           |
| No. grade IV (%)                        | 68 (44)          | 31 (72)          |
| No. oligodendroglial (%)                | 7 (5)            | 0 (0)            |
| No. mixed histology (%)                 | 44 (28)          | 0 (0)            |
| No. astrocytic (%)                      | 105 (67)         | 43 (100)         |
| No. I-A (%)                             | 47 (30)          | 12 (28)          |
| Mean age at diagnosis $\pm$ S.D., years | 35 $\pm$ 8       | 30 $\pm$ 5       |
| Median survival, months                 | 59               | 43               |
| No. I-X (%)                             | 70 (45)          | 30 (70)          |
| Mean age at diagnosis $\pm$ S.D., years | 56 $\pm$ 14      | 50 $\pm$ 14      |
| Median survival, months                 | 17               | 11               |
| No. I-CF (%)                            | 39 (25)          | 1 (2)            |
| Mean age at diagnosis $\pm$ S.D., years | 43 $\pm$ 13      | 53               |
| Median survival, months                 | 94               | N.R.             |

\*Cohort A was from Duke University Medical Center, United States. Cohort B was from the University of Sao Paulo, Brazil.

**Supplementary Table 3. Characteristics of mixed histology tumors analyzed in this study.**

| Sample ID | Diagnosis | Age | Sex | ATRX | ATRX IHC | ALT Staining | IDH1 | IDH2 | TP53 | CIC | FUBP1 | 1p and 19q LOH | I-A, I-CF or I-X   |
|-----------|-----------|-----|-----|------|----------|--------------|------|------|------|-----|-------|----------------|--------------------|
| 1         | OAI       | 38  | F   | MUT  | NA       | NA           | MUT  | no   | MUT  | no  | no    | no             | I-A                |
| 2         | OAI       | 80  | M   | no   | Positive | Negative     | MUT  | no   | no   | no  | no    | no             | I-X                |
| 3         | OAI       | 45  | M   | no   | NA       | NA           | MUT  | no   | no   | no  | no    | Yes            | I-CF               |
| 4         | OAI       | 52  | F   | no   | Positive | Negative     | MUT  | no   | no   | no  | no    | Yes            | I-CF               |
| 5         | OAI       | 21  | F   | no   | Negative | Positive     | MUT  | no   | MUT  | no  | no    | no             | I-A                |
| 6         | OAI       | 52  | F   | MUT  | NA       | NA           | MUT  | no   | MUT  | no  | no    | no             | I-A                |
| 7         | OAI       | 38  | M   | MUT  | Negative | Positive     | MUT  | no   | MUT  | no  | no    | no             | I-A                |
| 8         | OAI       | 51  | M   | no   | Positive | Negative     | MUT  | no   | no   | no  | no    | no             | I-X                |
| 9         | OAI       | 35  | F   | MUT  | Negative | Positive     | MUT  | no   | MUT  | no  | no    | no             | I-A                |
| 10        | OAI       | 61  | M   | no   | NA       | NA           | MUT  | no   | MUT  | no  | no    | no             | I-X                |
| 11        | OAI       | 52  | M   | MUT  | Negative | Positive     | MUT  | no   | MUT  | no  | no    | no             | I-A                |
| 12        | OAI       | 25  | F   | no   | Positive | Negative     | MUT  | no   | no   | MUT | no    | no             | I-CF               |
| 13        | OAI       | 30  | M   | MUT  | Negative | Positive     | MUT  | no   | MUT  | no  | no    | no             | I-A                |
| 14        | OAI       | 32  | M   | no   | Negative | Positive     | MUT  | no   | MUT  | no  | no    | no             | I-A                |
| 15        | OAI       | 32  | M   | no   | Positive | Negative     | no   | MUT  | no   | no  | no    | Yes            | I-CF               |
| 16        | OAI       | 34  | M   | MUT  | Negative | Positive     | MUT  | no   | MUT  | no  | no    | no             | I-A                |
| 17        | OAI       | 39  | F   | MUT  | Negative | Positive     | MUT  | no   | MUT  | no  | no    | no             | I-A                |
| 18        | OAI       | 46  | M   | no   | NA       | NA           | MUT  | no   | no   | no  | MUT   | Yes            | I-CF               |
| 19        | OAI       | 65  | M   | MUT  | Negative | Positive     | MUT  | no   | no   | no  | no    | no             | I-A                |
| 20        | OAI       | 38  | F   | MUT  | Negative | Positive     | MUT  | no   | MUT  | no  | no    | no             | I-A                |
| 21        | OAI       | 44  | F   | MUT  | NA       | NA           | MUT  | no   | MUT  | no  | no    | no             | I-A                |
| 22        | OAI       | 49  | M   | no   | Positive | Negative     | MUT  | no   | no   | no  | no    | Yes            | I-CF               |
| 23        | OAI       | 31  | M   | MUT  | Negative | Positive     | MUT  | no   | MUT  | no  | no    | no             | I-A                |
| 24        | OAI       | 34  | F   | MUT  | Negative | Positive     | MUT  | no   | MUT  | no  | no    | no             | I-A                |
| 25        | OAI       | 25  | M   | MUT  | Negative | Positive     | MUT  | no   | MUT  | no  | no    | no             | I-A                |
| 26        | OAI       | 32  | M   | MUT  | Negative | Positive     | MUT  | no   | MUT  | no  | no    | no             | I-A                |
| 27        | OAI       | 32  | M   | no   | Negative | Positive     | MUT  | no   | MUT  | no  | no    | no             | I-A                |
| 28        | OAI       | 26  | F   | MUT  | Negative | Positive     | MUT  | no   | MUT  | no  | no    | no             | I-A                |
| 29        | OAI       | 49  | F   | MUT  | NA       | NA           | MUT  | no   | MUT  | no  | no    | no             | I-A                |
| 30        | OAI       | 30  | M   | MUT  | Negative | Positive     | MUT  | no   | MUT  | no  | no    | no             | I-A                |
| 31        | OAI       | 55  | M   | MUT  | NA       | NA           | MUT  | no   | MUT  | no  | no    | no             | I-A                |
| 32        | OAI       | 48  | M   | no   | Positive | Negative     | MUT  | no   | no   | MUT | no    | Yes            | I-CF               |
| 33        | OAI       | 22  | F   | no   | Negative | Positive     | MUT  | MUT  | MUT  | no  | no    | no             | I-A                |
| 34        | OAI       | 44  | F   | no   | NA       | NA           | no   | no   | no   | no  | no    | no             | I-X                |
| 35        | OAI       | 2   | F   | MUT  | NA       | Positive     | MUT  | no   | MUT  | no  | no    | no             | I-A                |
| 36        | OAI       | 71  | M   | no   | NA       | NA           | MUT  | no   | no   | no  | no    | Yes            | I-CF               |
| 37        | OAI       | 42  | M   | no   | Negative | Positive     | MUT  | no   | MUT  | no  | no    | Yes            | Mixed I-A and I-CF |
| 38        | OAI       | 30  | M   | no   | Negative | Positive     | MUT  | no   | MUT  | no  | no    | no             | I-A                |
| 39        | OAI       | 45  | F   | no   | NA       | NA           | MUT  | no   | no   | MUT | MUT   | Yes            | I-CF               |
| 40        | OAI       | 35  | F   | MUT  | NA       | Positive     | MUT  | no   | MUT  | no  | no    | no             | I-A                |

\*OAI, grade II oligoastrocytoma; OAI, grade III oligoastrocytoma. Age is age at diagnosis.

**Supplementary Figure 1. Co-occurrence of *IDH*, *ATRX*, *CIC*, and *FUBP1* mutations in 363 brain tumors.**

**All CNS tumors**

|              | IDH | ATRX | TP53 | CIC | FUBP1 |
|--------------|-----|------|------|-----|-------|
| IDH (n=156)  | -   | 57   | 62   | 17  | 10    |
| ATRX (n=94)  | 95  | -    | 90   | 1   | 0     |
| TP53 (n=126) | 76  | 67   | -    | 0   | 0     |
| CIC (n=29)   | 93  | 3    | 0    | -   | 24    |
| FUBP1 (n=16) | 100 | 0    | 0    | 44  | -     |

**All adult gliomas**

|              | IDH | ATRX | TP53 | CIC | FUBP1 |
|--------------|-----|------|------|-----|-------|
| IDH (n=153)  | -   | 58   | 61   | 18  | 10    |
| ATRX (n=88)  | 99  | -    | 93   | 1   | 0     |
| TP53 (n=113) | 82  | 73   | -    | 0   | 0     |
| CIC (n=27)   | 100 | 4    | 0    | -   | 26    |
| FUBP1 (n=16) | 100 | 0    | 0    | 44  | -     |

**Astrocytic Tumors**

|             | IDH | ATRX | TP53 | CIC | FUBP1 |
|-------------|-----|------|------|-----|-------|
| IDH (n=68)  | -   | 78   | 87   | 1   | 3     |
| ATRX (n=54) | 98  | -    | 93   | 0   | 0     |
| TP53 (n=78) | 78  | 65   | -    | 0   | 0     |
| CIC (n=1)   | 100 | 0    | 0    | -   | 100   |
| FUBP1 (n=2) | 100 | 0    | 0    | 50  | -     |

**Oligodendroglial tumors**

|              | IDH | ATRX | TP53 | CIC | FUBP1 |
|--------------|-----|------|------|-----|-------|
| IDH (n=46)   | -   | 15   | 15   | 50  | 26    |
| ATRX (n=7)   | 100 | -    | 100  | 0   | 0     |
| TP53 (n=7)   | 100 | 100  | -    | 0   | 0     |
| CIC (n=23)   | 100 | 0    | 0    | -   | 22    |
| FUBP1 (n=12) | 100 | 0    | 0    | 42  | -     |

**Oligoastrocytic (Mixed) tumors**

|             | IDH | ATRX | TP53 | CIC | FUBP1 |
|-------------|-----|------|------|-----|-------|
| IDH (n=39)  | -   | 69   | 69   | 8   | 5     |
| ATRX (n=27) | 100 | -    | 96   | 0   | 0     |
| TP53 (n=27) | 100 | 96   | -    | 0   | 0     |
| CIC (n=3)   | 100 | 0    | 0    | -   | 33    |
| FUBP1 (n=2) | 100 | 0    | 0    | 50  | -     |

**IDH Mutant Gliomas**

|       | Oligo. | Mixed Histology | Astrocytic |
|-------|--------|-----------------|------------|
| ATRX  | 15     | 69              | 78         |
| TP53  | 15     | 69              | 87         |
| CIC   | 50     | 8               | 1          |
| FUBP1 | 26     | 5               | 3          |

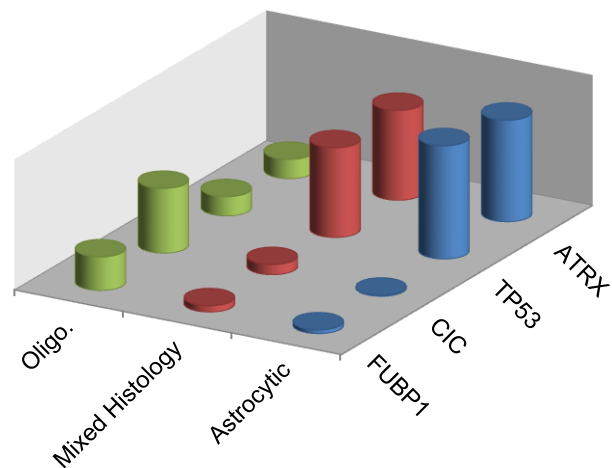

Groups include all CNS tumors (n=363), adult grade II-IV gliomas (n=257), oligodendroglial tumors (n=50), astrocytic tumors (n=167), mixed histology tumors (oligoastrocytomas, n=40), and all IDH-mutated adult gliomas (n=153). The graph displays mutation frequencies of in IDH-mutated astrocytic, oligodendroglial and mixed histology tumors based on histopathological diagnosis (n=153). Astrocytic tumors were defined in this figure as grade II astrocytomas (AII), grade III astrocytomas (AIII), secondary GBMs (2° GBM), and primary GBMs (1° GBM). Percentage of co-occurrence is shown.

**Supplementary Figure 2. Survival of patients with I-A and I-CF genetic signatures among different glioma subgroups.**

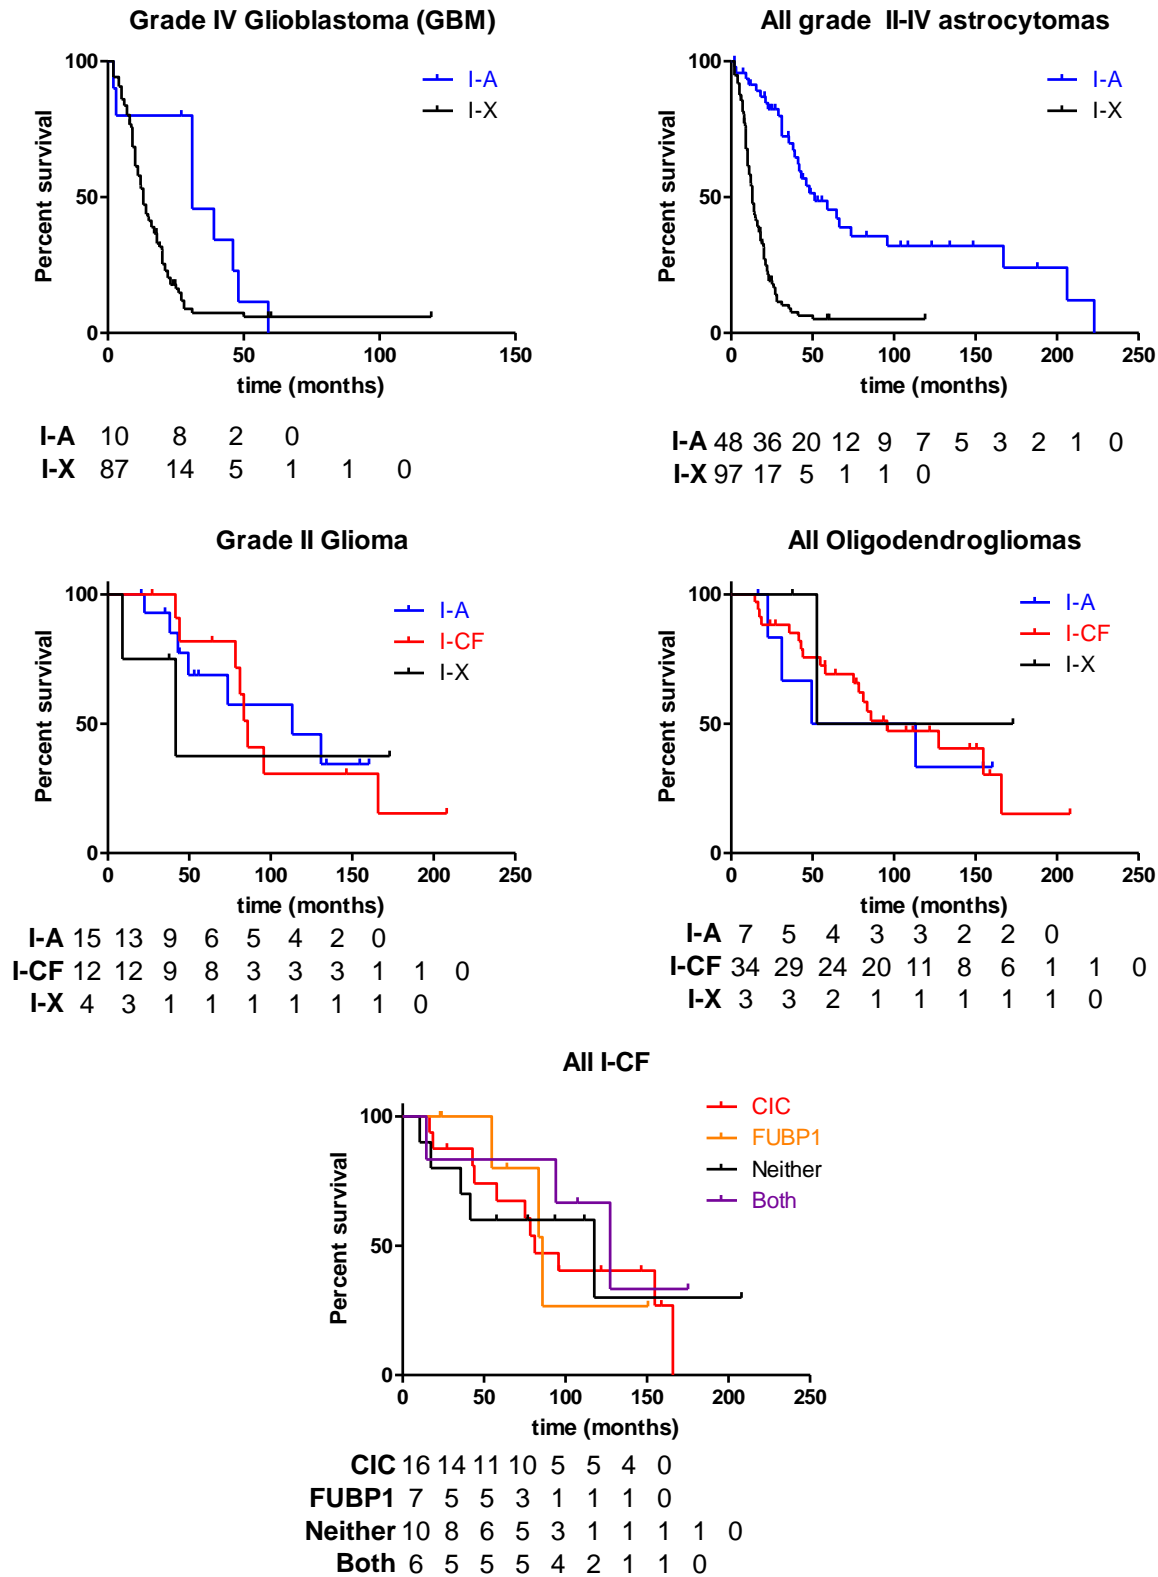

Kaplan-Meier estimates of overall survival are shown for subgroups of 199 patients with grade II-IV gliomas, with the number of patients at risk at each time shown below each respective plot. Survival was significantly different between grade IV glioblastoma patients (n=97) with I-A and I-X signatures (P=0.02, log-rank test). There was a significant difference in survival between astrocytoma patients (grade II-IV, n=145) whose tumors had I-A or I-X signatures (P<0.001, log-rank test). A significant difference in survival between patients with I-A, I-CF, and I-X tumors was not observed among all grade II glioma patients (n=31, P=0.79, log-rank test) or among oligodendroglioma patients (grade II-III, n=44; P=0.76, log-rank test). A significant difference in survival between patients with FUBP1 mutation, CIC mutation, both mutations, or neither mutation among all grade II-IV glioma patients with the I-CF signature (n=39) was not observed (P=0.43, log-rank test).
